# Supplementary material for: Ionizing radiation reduces ADAM10 expression in brain microvascular endothelial cells undergoing stress-induced senescence
Source: publisher site journal article supplement (doi:10.18632/aging.101225), 2017-04-17
Supplement: Supplementary file 1 [file aging-v9i4-101225-supplementary-material-SD1.pdf]

**SUPPLEMENTAL MATERIAL**

**Table S1. Antibodies used in this study.**

| Antibody                      | Catalog Number | Species           | Source            |
|-------------------------------|----------------|-------------------|-------------------|
| P21 (Waf1/Cip1)               | sc-6246        | Mouse monoclonal  | Santa Cruz        |
| MAP L3CB                      | sc-376404      | Mouse monoclonal  | Santa Cruz        |
| PAI-1                         | sc-8979        | Rabbit polyclonal | Santa Cruz        |
| ICAM-1                        | sc-1511R       | Rabbit polyclonal | Santa Cruz        |
| TLR2                          | sc-10739       | Rabbit polyclonal | Santa Cruz        |
| NEST                          | sc-20978       | Rabbit polyclonal | Santa Cruz        |
| NEO1                          | sc-15337       | Rabbit polyclonal | Santa Cruz        |
| P16 (CDKN2A)                  | PAI-46620      | Rabbit polyclonal | ThermoFisher      |
| $\alpha$ -Tubulin             | ab6046         | Rabbit polyclonal | Abcam             |
| Caveolin1                     | ab2910         | Rabbit polyclonal | Abcam             |
| Ki67                          | ab16667        | Rabbit monoclonal | Abcam             |
| P62                           | ab56416        | Mouse monoclonal  | Abcam             |
| DDX58                         | ab45428        | Rabbit polyclonal | Abcam             |
| ADAM10                        | ab2124695      | Rabbit monoclonal | Abcam             |
| LICAM                         | ab24345        | Mouse monoclonal  | Abcam             |
| GAPDH                         | ab181602       | Rabbit monoclonal | Abcam             |
| Wheat germ agglutinin – AF488 | W11261         | -                 | Life Technologies |

**Table S2. Proteins increased at cell surface ( $\geq 1.5$ -fold).**

| Protein      | Fold Change <sup>a</sup> | P value <sup>b</sup> | Protein Name                                                                                                       |
|--------------|--------------------------|----------------------|--------------------------------------------------------------------------------------------------------------------|
| P22777 PAI1  | 9.5                      | 0.00                 | Plasminogen activator inhibitor 1                                                                                  |
| P97798 NEO1  | 9.3                      | 0.03                 | Neogenin                                                                                                           |
| Q9QUN7 TLR2  | 5.2                      | 0.07                 | Toll-like receptor 2                                                                                               |
| P23927 CRYAB | 6.8                      | 0.00                 | Alpha-crystallin B chain                                                                                           |
| Q9D0J4 ARL2  | 3.3                      | 0.10                 | ADP-ribosylation factor-like protein 2                                                                             |
| Q6Q899 DDX58 | 2.9                      | 0.04                 | Probable ATP-dependent RNA helicase DDX58, retinoic acid inducible gene 1 protein (RIG-1)                          |
| P49945 FRIL2 | 2.8                      | 0.04                 | Ferritin light chain 2                                                                                             |
| P07724 ALBU  | 2.8                      | 0.35                 | Serum albumin                                                                                                      |
| Q8BHN3 GANAB | 2.8                      | 0.10                 | Neutral alpha-glucosidase AB                                                                                       |
| Q9DC70 NDUS7 | 2.8                      | 0.50                 | NADH dehydrogenase [ubiquinone] iron-sulfur protein 7, mitochondrial                                               |
| Q8K1N2 PHLB2 | 2.5                      | 0.11                 | Pleckstrin homology-like domain family B member 2                                                                  |
| O08638 MYH11 | 2.5                      | 0.05                 | Myosin-11                                                                                                          |
| Q6PHZ2 KCC2D | 2.3                      | 0.43                 | Calcium/calmodulin-dependent protein kinase type II subunit delta                                                  |
| P11276 FINC  | 2.3                      | 0.01                 | Anastellin                                                                                                         |
| Q08879 FBLN1 | 2.3                      | 0.22                 | Fibulin-1                                                                                                          |
| Q8BMF4 ODP2  | 2.2                      | 0.01                 | Dihydropyridyllysine-residue acetyltransferase component of pyruvate dehydrogenase complex (PDC-E2), mitochondrial |
| Q9QZQ1 AFAD  | 2.1                      | 0.43                 | Afadin                                                                                                             |
| Q9Z0R6 ITSN2 | 2.1                      | 0.09                 | Intersectin-2                                                                                                      |
| Q60680 IKKA  | 2.0                      | 0.15                 | Inhibitor of nuclear factor kappa-B kinase subunit alpha                                                           |
| P99029 PRDX5 | 2.0                      | 0.21                 | Peroxisiredoxin-5, mitochondrial                                                                                   |
| Q64133 AOFA  | 1.9                      | 0.00                 | Amine oxidase [flavin-containing] A                                                                                |
| P97770 THUM3 | 1.9                      | 0.47                 | THUMP domain-containing protein 3                                                                                  |
| Q6P5H2 NEST  | 1.9                      | 0.02                 | Nestin                                                                                                             |

|               |     |      |                                                                  |
|---------------|-----|------|------------------------------------------------------------------|
| P13597 ICAM1  | 1.9 | 0.21 | Intercellular adhesion molecule 1                                |
| P07356 ANXA2  | 1.8 | 0.00 | Annexin A2                                                       |
| P02089 HBB2   | 1.8 | 0.06 | Hemoglobin subunit beta-2                                        |
| Q0KL02 TRIO   | 1.8 | 0.00 | Triple functional domain protein                                 |
| Q9WTR1 TRPV2  | 1.8 | 0.03 | Transient receptor potential cation channel subfamily V member 2 |
| Q9QUM9 PSA6   | 1.8 | 0.15 | Proteasome subunit alpha type-6                                  |
| Q64727 VINC   | 1.8 | 0.07 | Vinculin                                                         |
| P40124 CAP1   | 1.8 | 0.00 | Adenylyl cyclase-associated protein 1                            |
| P85094 ISC2A  | 1.7 | 0.02 | Isochorismatase domain-containing protein 2A, mitochondrial      |
| Q03963 E2AK2  | 1.7 | 0.03 | Interferon-induced, double-stranded RNA-activated protein kinase |
| Q5U430 UBR3   | 1.7 | 0.23 | E3 ubiquitin-protein ligase UBR3                                 |
| Q80X90 FLNB   | 1.7 | 0.00 | Filamin-B                                                        |
| P54116 STOM   | 1.7 | 0.01 | Erythrocyte band 7 integral membrane protein                     |
| Q9CZ30 OLA1   | 1.7 | 0.10 | Obg-like ATPase 1                                                |
| Q9Z331 K2C6B  | 1.7 | 0.04 | Keratin, type II cytoskeletal 6B                                 |
| O09172 GSH0   | 1.6 | 0.28 | Glutamate--cysteine ligase regulatory subunit                    |
| Q02053 UBA1   | 1.6 | 0.05 | Ubiquitin-like modifier-activating enzyme 1                      |
| P00493 HPRT   | 1.6 | 0.01 | Hypoxanthine-guanine phosphoribosyltransferase                   |
| Q61171 PRDX2  | 1.6 | 0.01 | Peroxiredoxin-2                                                  |
| Q7TPR4 ACTN1  | 1.6 | 0.01 | Alpha-actinin-1                                                  |
| P03995 GFAP   | 1.6 | 0.14 | Glial fibrillary acidic protein                                  |
| P97434 MPRIIP | 1.6 | 0.10 | Myosin phosphatase Rho-interacting protein                       |
| P26041 MOES   | 1.6 | 0.00 | Moesin                                                           |
| Q9D6K9 CERS5  | 1.6 | 0.21 | Ceramide synthase 5                                              |
| P48678 LMNA   | 1.6 | 0.09 | Lamin-A/C                                                        |
| Q8BHY3 ANO1   | 1.6 | 0.17 | Anoctamin-1                                                      |
| Q8C522 ENDD1  | 1.5 | 0.16 | Endonuclease domain-containing 1 protein                         |
| P10107 ANXA1  | 1.5 | 0.00 | Annexin A1                                                       |
| A6X935 ITIH4  | 1.5 | 0.16 | Inter alpha-trypsin inhibitor, heavy chain 4                     |
| P11627 L1CAM  | 1.5 | 0.19 | Neural cell adhesion molecule L1                                 |
| Q9WVL2 STAT2  | 1.5 | 0.19 | Signal transducer and activator of transcription 2               |
| Q8VED5 K2C79  | 1.5 | 0.09 | Keratin, type II cytoskeletal 79                                 |
| P21279 GNAQ   | 1.5 | 0.21 | Guanine nucleotide-binding protein G(q) subunit alpha            |
| Q80X95 RRAGA  | 1.5 | 0.30 | Ras-related GTP-binding protein A                                |
| Q64261 CDK6   | 1.5 | 0.02 | Cyclin-dependent kinase 6                                        |
| Q8CGE9 RGS12  | 1.5 | 0.89 | Regulator of G-protein signaling 12                              |
| P26039 TLN1   | 1.5 | 0.25 | Talin-1                                                          |
| Q9R112 SQRD   | 1.5 | 0.00 | Sulfide:quinone oxidoreductase, mitochondrial                    |
| Q99PT1 GDIR1  | 1.5 | 0.17 | Rho GDP-dissociation inhibitor 1                                 |
| P34884 MIF    | 1.5 | 0.01 | Macrophage migration inhibitory factor                           |
| Q8R2Q8 BST2   | 1.5 | 0.20 | Bone marrow stromal antigen 2                                    |
| Q9WUP4 PORED  | 1.5 | 0.04 | Polyprenol reductase                                             |
| Q61595 KTN1   | 1.5 | 0.05 | Kinectin                                                         |
| Q61584 FXR1   | 1.5 | 0.35 | Fragile X mental retardation syndrome-related protein 1          |
| A2A699 F1712  | 1.5 | 0.32 | Protein FAM171A2                                                 |
| Q9WTI7 MYO1C  | 1.5 | 0.05 | Unconventional myosin-Ic                                         |
| A6H6E2 MMRN2  | 1.5 | 0.04 | Multimerin-2                                                     |
| Q9EPL8 IPO7   | 1.5 | 0.10 | Importin-7                                                       |
| P70275 SEM3E  | 1.5 | 0.37 | Semaphorin-3E                                                    |
| P48036 ANXA5  | 1.5 | 0.10 | Annexin A5                                                       |

<sup>a</sup> Fold change (Ratio irradiated/controls; mean of 3 independent experiments). <sup>b</sup> P value (Student's t-test).

**Table S3. Proteins decreased at the cell surface ( $\leq 1.5$ -fold).**

| <b>Protein</b> | <b>Fold Change<sup>a</sup></b> | <b>P value<sup>b</sup></b> | <b>Protein Name</b>                                                              |
|----------------|--------------------------------|----------------------------|----------------------------------------------------------------------------------|
| O88342 WDR1    | 0.2                            | 0.10                       | WD repeat-containing protein 1                                                   |
| P97310 MCM2    | 0.2                            | 0.00                       | DNA replication licensing factor MCM2                                            |
| P14869 RLA0    | 0.2                            | 0.02                       | 60S acidic ribosomal protein P0                                                  |
| Q8CGP2 H2B1P   | 0.3                            | 0.08                       | Histone H2B type 1-P                                                             |
| P09242 PPBT    | 0.3                            | 0.00                       | Alkaline phosphatase, tissue-nonspecific isozyme                                 |
| P35969 VGFR1   | 0.3                            | 0.03                       | Vascular endothelial growth factor receptor 1                                    |
| P62880 GBB2    | 0.3                            | 0.01                       | Guanine nucleotide-binding protein G(I)/G(S)/G(T) subunit beta-2                 |
| P16382 IL4RA   | 0.3                            | 0.02                       | Interleukin-4 receptor subunit alpha                                             |
| P08113 ENPL    | 0.3                            | 0.07                       | Endoplasmic                                                                      |
| Q9D662 SC23B   | 0.3                            | 0.03                       | Protein transport protein Sec23B                                                 |
| Q9D7S7 RL22L   | 0.4                            | 0.02                       | 60S ribosomal protein L22-like 1                                                 |
| Q9CZJ2 HS12B   | 0.4                            | 0.00                       | Heat shock 70 kDa protein 12B                                                    |
| P97311 MCM6    | 0.4                            | 0.06                       | DNA replication licensing factor MCM6                                            |
| Q6P4T2 U520    | 0.4                            | 0.14                       | U5 small nuclear ribonucleoprotein 200 kDa helicase                              |
| Q99JW4 LIMS1   | 0.4                            | 0.08                       | LIM and senescent cell antigen-like-containing domain protein 1                  |
| Q7TPV4 MBB1A   | 0.4                            | 0.09                       | Myb-binding protein 1A                                                           |
| P49718 MCM5    | 0.4                            | 0.00                       | DNA replication licensing factor MCM5                                            |
| Q9JJI8 RL38    | 0.4                            | 0.01                       | 60S ribosomal protein L38                                                        |
| O35598 ADA10   | 0.4                            | 0.05                       | Disintegrin and metalloproteinase domain-containing protein 10                   |
| Q9Z2X1 HNRPF   | 0.4                            | 0.00                       | Heterogeneous nuclear ribonucleoprotein F, N-terminally processed                |
| P19253 RL13A   | 0.4                            | 0.01                       | 60S ribosomal protein L13a                                                       |
| Q99J27 ACATN   | 0.4                            | 0.07                       | Acetyl-coenzyme A transporter 1                                                  |
| Q62465 VAT1    | 0.4                            | 0.14                       | Synaptic vesicle membrane protein VAT-1 homolog                                  |
| P49717 MCM4    | 0.4                            | 0.05                       | DNA replication licensing factor MCM4                                            |
| Q9QYJ0 DNJA2   | 0.4                            | 0.04                       | DnaJ homolog subfamily A member 2                                                |
| P97857 ATS1    | 0.4                            | 0.03                       | A disintegrin and metalloproteinase with thrombospondin motifs 1                 |
| Q3TDQ1 STT3B   | 0.4                            | 0.04                       | Dolichyl-diphosphooligosaccharide--protein glycosyltransferase subunit           |
| Q91WF3 ADCY4   | 0.4                            | 0.01                       | Adenylate cyclase type 4                                                         |
| P13864 DNMT1   | 0.5                            | 0.02                       | DNA (cytosine-5)-methyltransferase 1                                             |
| Q8BK67 RCC2    | 0.5                            | 0.20                       | Protein RCC2                                                                     |
| P61164 ACTZ    | 0.5                            | 0.29                       | Alpha-centractin                                                                 |
| P61211 ARL1    | 0.5                            | 0.10                       | ADP-ribosylation factor-like protein 1                                           |
| P62245 RS15A   | 0.5                            | 0.02                       | 40S ribosomal protein S15a                                                       |
| Q64337 SQSTM   | 0.5                            | 0.01                       | Sequestosome-1                                                                   |
| P02468 LAMC1   | 0.5                            | 0.17                       | Laminin subunit gamma-1                                                          |
| P62918 RL8     | 0.5                            | 0.67                       | 60S ribosomal protein L8                                                         |
| P15116 CADH2   | 0.5                            | 0.23                       | Cadherin-2                                                                       |
| Q8R422 CD109   | 0.5                            | 0.04                       | CD109 antigen                                                                    |
| Q80TN5 ZDH17   | 0.5                            | 0.02                       | Palmitoyltransferase ZDHHC17                                                     |
| Q9ES46 PARVB   | 0.5                            | 0.15                       | Beta-parvin                                                                      |
| Q9CXW4 RL11    | 0.5                            | 0.02                       | 60S ribosomal protein L11                                                        |
| P62270 RS18    | 0.5                            | 0.23                       | 40S ribosomal protein S18                                                        |
| Q03145 EPHA2   | 0.5                            | 0.09                       | Ephrin type-A receptor 2                                                         |
| P62301 RS13    | 0.5                            | 0.01                       | 40S ribosomal protein S13                                                        |
| Q6P5D8 SMHD1   | 0.5                            | 0.27                       | Structural maintenance of chromosomes flexible hinge domain-containing protein 1 |
| P25206 MCM3    | 0.5                            | 0.02                       | DNA replication licensing factor MCM3                                            |
| P16330 CN37    | 0.5                            | 0.07                       | 2',3'-cyclic-nucleotide 3'-phosphodiesterase                                     |
| P97351 RS3A    | 0.5                            | 0.00                       | 40S ribosomal protein S3a                                                        |
| P11688 ITA5    | 0.5                            | 0.08                       | Integrin alpha-5 light chain                                                     |
| O08573 LEG9    | 0.5                            | 0.05                       | Galectin-9                                                                       |
| Q9JHJ0 TMOD3   | 0.5                            | 0.00                       | Tropomodulin-3                                                                   |

|              |     |      |                                                                      |
|--------------|-----|------|----------------------------------------------------------------------|
| Q9D819 IPYR  | 0.5 | 0.21 | Inorganic pyrophosphatase                                            |
| Q8BWX3 ERF1  | 0.5 | 0.19 | Eukaryotic peptide chain release factor subunit 1                    |
| Q7TNC4 LC7L2 | 0.5 | 0.12 | Putative RNA-binding protein Luc7-like 2                             |
| Q5SWU9 ACACA | 0.5 | 0.00 | Biotin carboxylase                                                   |
| P54761 EPHB4 | 0.5 | 0.07 | Ephrin type-B receptor 4                                             |
| P62830 RL23  | 0.5 | 0.09 | 60S ribosomal protein L23                                            |
| P20029 GRP78 | 0.5 | 0.02 | 78 kDa glucose-regulated protein                                     |
| P20444 KPCA  | 0.6 | 0.11 | Protein kinase C alpha type                                          |
| Q8VDW0 DX39A | 0.6 | 0.04 | ATP-dependent RNA helicase DDX39A                                    |
| Q64151 SEM4C | 0.6 | 0.34 | Semaphorin-4C                                                        |
| P02463 CO4A1 | 0.6 | 0.79 | Arresten                                                             |
| Q9D5V5 CUL5  | 0.6 | 0.25 | Cullin-5                                                             |
| Q8R1F1 NIBL1 | 0.6 | 0.34 | Niban-like protein 1                                                 |
| Q01705 NOTC1 | 0.6 | 0.30 | Neurogenic locus notch homolog protein 1                             |
| Q9D8N0 EF1G  | 0.6 | 0.10 | Elongation factor 1-gamma                                            |
| P62242 RS8   | 0.6 | 0.05 | 40S ribosomal protein S8                                             |
| P61620 S61A1 | 0.6 | 0.00 | Protein transport protein Sec61 subunit alpha isoform 1              |
| Q8BX57 PXK   | 0.6 | 0.23 | PX domain-containing protein kinase-like protein                     |
| Q7M759 AB17B | 0.6 | 0.03 | Alpha/beta hydrolase domain-containing protein 17B                   |
| P35979 RL12  | 0.6 | 0.01 | 60S ribosomal protein L12                                            |
| P08775 RPB1  | 0.6 | 0.59 | DNA-directed RNA polymerase II subunit RPB1                          |
| Q9JLV5 CUL3  | 0.6 | 0.22 | Cullin-3                                                             |
| Q9QUR6 PPCE  | 0.6 | 1.00 | Prolyl endopeptidase                                                 |
| Q9CU62 SMC1A | 0.6 | 0.89 | Structural maintenance of chromosomes protein 1A                     |
| Q8R1M2 H2AJ  | 0.6 | 0.26 | Histone H2A.J                                                        |
| Q60605 MYL6  | 0.6 | 0.16 | Myosin light polypeptide 6                                           |
| P11440 CDK1  | 0.6 | 0.84 | Cyclin-dependent kinase 1                                            |
| P62908 RS3   | 0.6 | 0.01 | 40S ribosomal protein S3                                             |
| O55222 ILK   | 0.6 | 0.07 | Integrin-linked protein kinase                                       |
| P13439 UMPS  | 0.6 | 0.13 | Orotidine 5'-phosphate decarboxylase                                 |
| Q9Z0L0 TPBG  | 0.6 | 0.15 | Trophoblast glycoprotein                                             |
| Q05793 PGBM  | 0.6 | 1.00 | Basement membrane-specific heparan sulfate proteoglycan core protein |
| P51410 RL9   | 0.6 | 0.02 | 60S ribosomal protein L9                                             |
| B2RU80 PTPRB | 0.6 | 0.03 | Receptor-type tyrosine-protein phosphatase beta                      |
| Q80U95 UBE3C | 0.6 | 0.20 | Ubiquitin-protein ligase E3C                                         |
| Q61739 ITA6  | 0.6 | 0.09 | Integrin alpha-6 light chain                                         |
| Q9D1R9 RL34  | 0.6 | 0.58 | 60S ribosomal protein L34                                            |
| O70475 UGDH  | 0.6 | 0.99 | UDP-glucose 6-dehydrogenase                                          |
| P14131 RS16  | 0.6 | 0.00 | 40S ribosomal protein S16                                            |
| Q9JIK5 DDX21 | 0.6 | 0.07 | Nucleolar RNA helicase 2                                             |
| P97333 NRP1  | 0.6 | 0.11 | Neuropilin-1                                                         |
| Q9D0E1 HNRPM | 0.6 | 0.00 | Heterogeneous nuclear ribonucleoprotein M                            |
| Q8BP67 RL24  | 0.6 | 0.01 | 60S ribosomal protein L24                                            |
| Q9D198 SYF2  | 0.6 | 0.89 | Functional Spliceosome-Associated Protein 29                         |
| P17225 PTBP1 | 0.6 | 0.26 | Polypyrimidine tract-binding protein 1                               |
| Q9JJ28 FLII  | 0.6 | 0.12 | Protein flightless-1 homolog                                         |
| O35286 DHX15 | 0.6 | 0.31 | Putative pre-mRNA-splicing factor ATP-dependent RNA helicase         |
| P70168 IMB1  | 0.6 | 0.09 | Importin subunit beta-1                                              |
| O35218 CPSF2 | 0.6 | 0.25 | Cleavage and polyadenylation specificity factor subunit 2            |
| Q9D8Z1 ASCC1 | 0.6 | 0.99 | Activating signal cointegrator 1 complex subunit 1                   |
| Q9QZM4 TR10B | 0.6 | 0.03 | Tumor necrosis factor receptor superfamily member 10B                |
| Q8BIJ6 SYIM  | 0.6 | 0.32 | Isoleucine--tRNA ligase, mitochondrial                               |
| P16056 MET   | 0.6 | 0.06 | Hepatocyte growth factor receptor                                    |
| P97363 SPTC2 | 0.6 | 0.34 | Serine palmitoyltransferase 2                                        |
| Q62167 DDX3X | 0.6 | 0.23 | ATP-dependent RNA helicase DDX3X                                     |

|              |     |      |                                                             |
|--------------|-----|------|-------------------------------------------------------------|
| Q8BTJ4 ENPP4 | 0.6 | 0.99 | Bis(5'-adenosyl)-triphosphatase enpp4                       |
| Q9JL15 LEG8  | 0.6 | 0.04 | Galectin-8                                                  |
| P61358 RL27  | 0.6 | 0.01 | 60S ribosomal protein L27                                   |
| Q3UH93 PLXD1 | 0.6 | 0.19 | Plexin-D1                                                   |
| Q02257 PLAK  | 0.6 | 0.05 | Junction plakoglobin                                        |
| O70503 DHB12 | 0.6 | 0.35 | Very-long-chain 3-oxoacyl-CoA reductase                     |
| Q05920 PYC   | 0.6 | 0.21 | Pyruvate carboxylase, mitochondrial                         |
| P62849 RS24  | 0.6 | 0.10 | 40S ribosomal protein S24                                   |
| P80315 TCPD  | 0.6 | 0.00 | T-complex protein 1 subunit delta                           |
| P12382 K6PL  | 0.6 | 0.99 | ATP-dependent 6-phosphofructokinase, liver type             |
| P35293 RAB18 | 0.6 | 0.32 | Ras-related protein Rab-18                                  |
| Q9D8E6 RL4   | 0.6 | 0.01 | 60S ribosomal protein L4                                    |
| O89103 C1QR1 | 0.6 | 0.06 | Complement component C1q receptor                           |
| O54890 ITB3  | 0.6 | 0.85 | Integrin beta-3                                             |
| P23116 EIF3A | 0.6 | 0.99 | Eukaryotic translation initiation factor 3 subunit A        |
| B2RXS4 PLXB2 | 0.6 | 0.16 | Plexin-B2                                                   |
| O88746 TOM1  | 0.6 | 0.34 | Target of Myb protein 1                                     |
| Q61024 ASNS  | 0.6 | 0.01 | Asparagine synthetase [glutamine-hydrolyzing]               |
| P63037 DNJA1 | 0.6 | 0.21 | DnaJ homolog subfamily A member 1                           |
| Q62351 TFR1  | 0.7 | 0.09 | Transferrin receptor protein 1                              |
| Q60865 CAPR1 | 0.7 | 0.13 | Caprin-1                                                    |
| Q99LC5 ETFA  | 0.7 | 0.34 | Electron transfer flavoprotein subunit alpha, mitochondrial |
| Q06806 TIE1  | 0.7 | 0.29 | Tyrosine-protein kinase receptor Tie-1                      |
| P16110 LEG3  | 0.7 | 0.11 | Galectin-3                                                  |
| P55284 CADH5 | 0.7 | 0.19 | Cadherin-5                                                  |
| Q9CZR2 NALD2 | 0.7 | 0.49 | N-acetylated-alpha-linked acidic dipeptidase 2              |
| Q9DCD0 6PGD  | 0.7 | 0.28 | 6-phosphogluconate dehydrogenase, decarboxylating           |

<sup>a</sup> Fold change (Ratio irradiated/controls; mean of 3 independent experiments). <sup>b</sup> P value (Student's *t*-test).

**Table S4. Ingenuity pathway analysis.**

| <b>TOP CANONICAL PATHWAYS</b>              |                           |                             |
|--------------------------------------------|---------------------------|-----------------------------|
| <b>Name</b>                                | <b>p-value</b>            | <b>Overlap</b>              |
| EIF2 signalling                            | 2.47E-34                  | 27.6% 51/185                |
| Regulation of eIF4 and p70S6K signalling   | 1.01E-17                  | 21.2% 31/146                |
| Epithelial adherens junction signalling    | 6.12E-15                  | 19.2% 28/146                |
| Caveolar-mediated endocytosis signalling   | 2.56E-13                  | 26.8% 19/71                 |
| Germ cell-sertoli cell junction signalling | 4.87E-13                  | 16.9% 27/160                |
| <b>TOP NETWORKS</b>                        |                           |                             |
| <b>Name</b>                                | <b>p-value</b>            | <b># molecules</b>          |
| Cellular movement                          | 1.79E-05 – 4.51E-32       | 214                         |
| Cellular growth and proliferation          | 8.08E-06 – 5.18E-29       | 285                         |
| Cellular assembly and organization         | 8.13E-06 – 3.12E-26       | 211                         |
| Cellular function and maintenance          | 1.79E-05 – 3.12E-26       | 249                         |
| Protein synthesis                          | 1.26E-05 – 2.77E-24       | 139                         |
| <b>TOP TOX LISTS</b>                       |                           |                             |
| <b>Name</b>                                | <b>p-value</b>            | <b>Overlap</b>              |
| Renal necrosis/cell death                  | 3.00E-09                  | 8.5% 42/496                 |
| NRF2-mediated oxidative stress response    | 3.73E-05                  | 8.5% 20/234                 |
| PPAR/RXR activation                        | 4.99E-05                  | 9.3% 17/183                 |
| Hypoxia-inducible factor signalling        | 2.74E-04                  | 12.9% 9/70                  |
| Mitochondrial dysfunction                  | 3.50E-04                  | 8.5% 15/176                 |
| <b>TOP UPSTREAM REGULATORS</b>             |                           |                             |
| <b>Upstream Regulator</b>                  | <b>p-value of overlap</b> | <b>Predicted Activation</b> |
| MYC                                        | 1.28E-40                  | Inhibited                   |
| MYCN                                       | 1.37E-37                  | Inhibited                   |
| TP53                                       | 1.80E-34                  | -                           |
| sirolimus                                  | 4.69E-31                  | Activated                   |
| 5-fluorouracil                             | 7.19E-28                  | Activated                   |
